# Supplementary material
Source: PubMed Central journal article supplement (PMC8411369)
Supplement: NIHMS1733998-supplement-PMID_32112620_supplemental_material.pdf [file NIHMS1733998-supplement-PMID_32112620_supplemental_material.pdf]

|                                               |    |    |    |    |    |    |    |    |
|-----------------------------------------------|----|----|----|----|----|----|----|----|
| Never                                         | 48 | 68 | 40 | 66 | 63 | 80 | 68 | 75 |
| Current                                       | 14 | 15 | 16 | 17 | 8  | 6  | 11 | 12 |
| Former                                        | 38 | 17 | 44 | 18 | 29 | 14 | 21 | 13 |
| <b>Alcohol consumption</b>                    |    |    |    |    |    |    |    |    |
| Never                                         | 21 | 13 | 17 | 10 | 33 | 23 | 25 | 16 |
| Current                                       | 14 | 8  | 14 | 8  | 11 | 9  | 13 | 9  |
| Former                                        | 65 | 79 | 69 | 81 | 56 | 67 | 62 | 75 |
| <b>Physical activity</b>                      |    |    |    |    |    |    |    |    |
| None/unable                                   | 40 | 19 | 37 | 16 | 51 | 32 | 42 | 23 |
| Moderate                                      | 23 | 27 | 23 | 27 | 19 | 26 | 22 | 26 |
| High                                          | 37 | 54 | 40 | 57 | 30 | 42 | 36 | 50 |
| <b>Weight, kg/m<sup>2</sup></b>               |    |    |    |    |    |    |    |    |
| Underweight/normal, <25                       | 39 | 50 | 44 | 54 | 26 | 30 | 31 | 40 |
| Overweight, ≥25-<30                           | 27 | 25 | 26 | 24 | 27 | 28 | 29 | 28 |
| Obese, ≥30                                    | 35 | 25 | 30 | 22 | 47 | 41 | 40 | 32 |
| <b>Clinical characteristics</b>               |    |    |    |    |    |    |    |    |
| Hypertension                                  | 18 | 12 | 16 | 11 | 27 | 22 | 14 | 11 |
| Diabetes <sup>f</sup>                         | 5  | 3  | 4  | 2  | 6  | 5  | 7  | 3  |
| Heart disease                                 | 6  | 5  | 6  | 5  | 5  | 4  | 4  | 4  |
| Cancer                                        | 5  | 4  | 6  | 5  | 2  | 2  | 3  | 3  |
| Depressive symptoms<br>(most/all of the time) | 6  | 2  | 5  | 2  | 8  | 3  | 7  | 3  |
| <b>Health status</b>                          |    |    |    |    |    |    |    |    |
| Excellent/very good                           | 55 | 75 | 58 | 78 | 49 | 65 | 54 | 68 |
| Good                                          | 30 | 19 | 29 | 18 | 32 | 26 | 31 | 25 |
| Fair/poor                                     | 14 | 6  | 13 | 5  | 19 | 9  | 14 | 7  |

Abbreviations: GED, General Education Diploma; SE, Standard error

<sup>a</sup> Unweighted frequencies; weighted percentages and means. Some columns may not add to 100% due to rounding.

<sup>b</sup> Self-employed includes work without pay.

<sup>c</sup> Data available from 2013 to 2017(N=26,615).

<sup>f</sup> Includes type 1 and 2 diabetes mellitus; does not include gestational diabetes.

**Supplemental Table 2. Prevalence Ratios and 95% Confidence Intervals of Sleep Characteristics for Pregnant compared to non-Pregnant Women, overall and by Race/Ethnicity, National Health Interview Survey, 2004-2017**

|                                                          | <b>Model 1<sup>a</sup></b><br><b>(Age)</b> | <b>Model 2<sup>b</sup></b><br><b>(Socio-<br/>demographics)</b> | <b>Model 3<sup>c</sup></b><br><b>(Health<br/>Characteristics)</b> |
|----------------------------------------------------------|--------------------------------------------|----------------------------------------------------------------|-------------------------------------------------------------------|
| <b>2004-2017, N = 69,382</b>                             |                                            |                                                                |                                                                   |
| <b>Short sleep duration (&lt;7 hours)<sup>d</sup></b>    |                                            |                                                                |                                                                   |
| Overall                                                  | 0.70 (0.64-0.77)                           | 0.74 (0.68-0.81)                                               | 0.75 (0.68-0.82)                                                  |
| Whites                                                   | 0.69 (0.61-0.78)                           | 0.73 (0.65-0.81)                                               | 0.73 (0.65-0.82)                                                  |
| Blacks                                                   | 0.74 (0.61-0.90)                           | 0.73 (0.60-0.88)                                               | 0.75 (0.62-0.91)                                                  |
| Hispanics/Latinas                                        | 0.74 (0.59-0.93)                           | 0.74 (0.59-0.94)                                               | 0.77 (0.61-0.97)                                                  |
| <b>2004-2017, N = 48,342</b>                             |                                            |                                                                |                                                                   |
| <b>Long sleep duration (&gt;9 hours)<sup>e</sup></b>     |                                            |                                                                |                                                                   |
| Overall                                                  | 2.02 (1.71-2.38)                           | 2.12 (1.80-2.51)                                               | 2.06 (1.74-2.43)                                                  |
| Whites                                                   | 2.06 (1.67-2.55)                           | 2.25 (1.82-2.78)                                               | 2.15 (1.74-2.67)                                                  |
| Blacks <sup>f</sup>                                      | 1.80 (1.33-2.44)                           | 1.70 (1.25-2.31)                                               | 1.71 (1.27-2.30)                                                  |
| Hispanics/Latinas <sup>f</sup>                           | 2.17 (1.47-3.20)                           | 2.04 (1.36-3.04)                                               | 2.04 (1.37-3.05)                                                  |
| <b>2013-2016, N = 26,615</b>                             |                                            |                                                                |                                                                   |
| <b>Trouble falling asleep</b>                            |                                            |                                                                |                                                                   |
| Overall                                                  | 0.95 (0.87-1.04)                           | 0.98 (0.90, 1.08)                                              | 1.02 (0.94-1.12)                                                  |
| Whites                                                   | 0.91 (0.82-1.02)                           | 0.96 (0.87, 1.07)                                              | 0.99 (0.89-1.09)                                                  |
| Blacks <sup>f</sup>                                      | 1.17 (0.95-1.45)                           | 1.18 (0.94, 1.48)                                              | 1.26 (1.03-1.53)                                                  |
| Hispanics/Latinas <sup>f</sup>                           | 0.92 (0.71-1.19)                           | 0.94 (0.72, 1.21)                                              | 1.02 (0.81-1.29)                                                  |
| <b>Trouble staying asleep</b>                            |                                            |                                                                |                                                                   |
| Overall                                                  | 1.31 (1.22- 1.40)                          | 1.31 (1.22-1.41)                                               | 1.34 (1.25-1.44)                                                  |
| Whites                                                   | 1.33 (1.23-1.43)                           | 1.34 (1.25-1.44)                                               | 1.36 (1.27-1.46)                                                  |
| Blacks                                                   | 1.28 (1.04-1.57)                           | 1.28 (1.04-1.58)                                               | 1.33 (1.08-1.64)                                                  |
| Hispanics/Latinas                                        | 1.14 (0.91-1.44)                           | 1.14 (0.90-1.44)                                               | 1.23 (1.00-1.51)                                                  |
| <b>Did not wake up most (≥4) days<br/>feeling rested</b> |                                            |                                                                |                                                                   |
| Overall                                                  | 1.05 (0.97-1.14)                           | 1.04 (0.96-1.13)                                               | 1.05 (0.97-1.14)                                                  |
| Whites                                                   | 1.03 (0.93-1.13)                           | 1.02 (0.93-1.12)                                               | 1.02 (0.93-1.12)                                                  |
| Blacks                                                   | 1.18 (0.99-1.40)                           | 1.15 (0.95-1.39)                                               | 1.19 (1.00-1.41)                                                  |
| Hispanics/Latinas                                        | 1.06 (0.85-1.32)                           | 1.05 (0.83-1.32)                                               | 1.08 (0.87-1.34)                                                  |
| <b>Took sleep medication in prior<br/>week</b>           |                                            |                                                                |                                                                   |
| Overall <sup>f</sup>                                     | 0.49 (0.35-0.68)                           | 0.51 (0.37-0.71)                                               | 0.54 (0.40-0.74)                                                  |
| Whites <sup>f</sup>                                      | 0.40 (0.27-0.60)                           | 0.44 (0.30-0.65)                                               | 0.45 (0.31-0.64)                                                  |
| Blacks <sup>f</sup>                                      | 0.87 (0.40-1.88)                           | 0.86 (0.39-1.89)                                               | 0.98 (0.46-2.09)                                                  |
| Hispanics/Latinas <sup>f</sup>                           | 0.68 (0.31-1.51)                           | 0.70 (0.31-1.54)                                               | 0.82 (0.38-1.77)                                                  |

<sup>a</sup> Model 1 is adjusted for continuous age in years.

<sup>b</sup> Model 2 is adjusted for age plus marital status, educational attainment, occupational class, and household income.

<sup>c</sup> Model 3 is adjusted for model 2 variables plus smoking status, alcohol consumption, physical activity, self-rated health status, hypertension, diabetes, heart disease, cancer, and depressive symptoms.

<sup>d</sup> Analysis excludes those who reported >9 hours of sleep.

<sup>e</sup> Analysis excludes those who reported <7 hours of sleep.

<sup>f</sup> Fewer than 50 participants in a cell of the crosstab between pregnancy status and the sleep outcome.

**Supplemental Table 3. Interaction *P*-values for Stratified Analyses of Sleep Characteristics for Pregnant Versus Non-pregnant Women.**

|                                                            | <b>Model 1<sup>a</sup></b><br><b>(Age)</b> | <b>Model 2<sup>b</sup></b><br><b>(Socio-<br/>demographics)</b> | <b>Model 3<sup>c</sup></b><br><b>(Health<br/>characteristics)</b> |
|------------------------------------------------------------|--------------------------------------------|----------------------------------------------------------------|-------------------------------------------------------------------|
| <b>Short sleep duration (&lt;7 hours)</b>                  |                                            |                                                                |                                                                   |
| pregnancy*race/ethnicity                                   | 0.9295                                     | 0.9403                                                         | 0.9502                                                            |
| pregnancy*age group <sup>d</sup>                           | 0.0971                                     | <b>0.0253</b>                                                  | 0.0561                                                            |
| pregnancy*race/ethnicity*age group <sup>d</sup>            | 0.2391                                     | 0.1933                                                         | 0.2327                                                            |
| <b>Long sleep duration (&gt;9 hours)</b>                   |                                            |                                                                |                                                                   |
| pregnancy*race/ethnicity                                   | 0.8015                                     | 0.3770                                                         | 0.5214                                                            |
| pregnancy*age group <sup>d</sup>                           | <b>0.0118</b>                              | 0.1268                                                         | 0.1095                                                            |
| pregnancy*race/ethnicity*age group <sup>d</sup>            | 0.8115                                     | 0.7664                                                         | 0.8562                                                            |
| <b>Trouble falling asleep (yes)</b>                        |                                            |                                                                |                                                                   |
| pregnancy*race/ethnicity                                   | 0.1256                                     | 0.2833                                                         | 0.1280                                                            |
| pregnancy*age group <sup>d</sup>                           | 0.4097                                     | 0.5317                                                         | 0.4791                                                            |
| pregnancy*race/ethnicity*age group <sup>d</sup>            | 0.7273                                     | 0.6900                                                         | 0.6127                                                            |
| <b>Trouble staying asleep (yes)</b>                        |                                            |                                                                |                                                                   |
| pregnancy*race/ethnicity                                   | 0.2480                                     | 0.1938                                                         | 0.3926                                                            |
| pregnancy*age group <sup>d</sup>                           | 0.4277                                     | 0.3195                                                         | 0.3338                                                            |
| pregnancy*race/ethnicity*age group <sup>d</sup>            | 0.2700                                     | 0.2812                                                         | 0.2141                                                            |
| <b>Did not wake up most (≥4) days feeling rested (yes)</b> |                                            |                                                                |                                                                   |
| pregnancy*race/ethnicity                                   | 0.4113                                     | 0.5582                                                         | 0.3333                                                            |
| pregnancy*age group <sup>d</sup>                           | 0.7449                                     | 0.5068                                                         | 0.5564                                                            |
| pregnancy*race/ethnicity*age group <sup>d</sup>            | 0.6236                                     | 0.6572                                                         | 0.6281                                                            |
| <b>Took sleep medication in prior week (yes)</b>           |                                            |                                                                |                                                                   |
| pregnancy*race/ethnicity                                   | 0.1466                                     | 0.2174                                                         | 0.0977                                                            |
| pregnancy*age group <sup>d</sup>                           | 0.8038                                     | 0.8600                                                         | 0.6430                                                            |
| pregnancy*race/ethnicity*age group <sup>d</sup>            | <b>&lt;0.0001</b>                          | <b>&lt;0.0001</b>                                              | <b>&lt;0.0001</b>                                                 |

<sup>a</sup> Model 1 is adjusted for continuous age in years.

<sup>b</sup> Model 2 is adjusted for age plus marital status, educational attainment, occupational class, and household income.

<sup>c</sup> Model 3 is adjusted for model 2 variables plus smoking status, alcohol consumption, physical activity, self-rated health status, hypertension, diabetes, heart disease, cancer, and depressive symptoms.

<sup>d</sup> Age group dichotomized as <35 years vs. 35+ years.

**Supplemental Table 4. Prevalence Ratios and 95% Confidence Intervals of Sleep Characteristics comparing Non-Hispanic black and Hispanic/Latina to Non-Hispanic white Participants by Pregnancy Status, National Health Interview Survey, 2004-2017**

|                                                                | <b>Model 1<sup>a</sup></b><br><b>(Age)</b> | <b>Model 2<sup>b</sup></b><br><b>(Socio-<br/>demographics)</b> | <b>Model 3<sup>c</sup></b><br><b>(Health<br/>characteristics)</b> |
|----------------------------------------------------------------|--------------------------------------------|----------------------------------------------------------------|-------------------------------------------------------------------|
| <b>2004-2017, N = 69,382</b>                                   |                                            |                                                                |                                                                   |
| <b>Short sleep duration (&lt;7 hours)<sup>d</sup></b>          |                                            |                                                                |                                                                   |
| <i>Pregnant Women</i>                                          |                                            |                                                                |                                                                   |
| Whites                                                         | Reference                                  | Reference                                                      | Reference                                                         |
| Blacks                                                         | 1.49 (1.19-1.86)                           | 1.29 (1.03-1.61)                                               | 1.35 (1.08-1.67)                                                  |
| Hispanics/Latinas                                              | 1.29 (0.99-1.66)                           | 1.15 (0.89-1.49)                                               | 1.22 (0.95-1.57)                                                  |
| <i>Non-Pregnant Women</i>                                      |                                            |                                                                |                                                                   |
| Whites                                                         | Reference                                  | Reference                                                      | Reference                                                         |
| Blacks                                                         | 1.38 (1.34-1.43)                           | 1.29 (1.25-1.33)                                               | 1.31 (1.26-1.35)                                                  |
| Hispanics/Latinas                                              | 1.19 (1.15-1.24)                           | 1.13 (1.08-1.17)                                               | 1.15 (1.11-1.20)                                                  |
| <b>2004-2017, N = 48,342</b>                                   |                                            |                                                                |                                                                   |
| <b>Long sleep duration (&gt;9 hours)<sup>e</sup></b>           |                                            |                                                                |                                                                   |
| <i>Pregnant Women<sup>f</sup></i>                              |                                            |                                                                |                                                                   |
| Whites                                                         | Reference                                  | Reference                                                      | Reference                                                         |
| Blacks                                                         | 1.75 (1.25-2.44)                           | 1.06 (0.74-1.50)                                               | 1.10 (0.78-1.55)                                                  |
| Hispanics/Latinas                                              | 1.34 (0.89-2.01)                           | 0.89 (0.59-1.34)                                               | 0.96 (0.63-1.45)                                                  |
| <i>Non-Pregnant Women</i>                                      |                                            |                                                                |                                                                   |
| Whites                                                         | Reference                                  | Reference                                                      | Reference                                                         |
| Blacks                                                         | 2.00 (1.77-2.25)                           | 1.40 (1.23-1.59)                                               | 1.39 (1.22-1.59)                                                  |
| Hispanics/Latinas                                              | 1.27 (1.09-1.49)                           | 0.98 (0.83-1.15)                                               | 1.01 (0.86-1.19)                                                  |
| <b>2013-2016, N = 26,615</b>                                   |                                            |                                                                |                                                                   |
| <b>Trouble falling asleep (yes)</b>                            |                                            |                                                                |                                                                   |
| <i>Pregnant Women<sup>f</sup></i>                              |                                            |                                                                |                                                                   |
| Whites                                                         | Reference                                  | Reference                                                      | Reference                                                         |
| Blacks                                                         | 1.17 (0.94-1.46)                           | 1.02 (0.80-1.29)                                               | 1.09 (0.88-1.34)                                                  |
| Hispanics/Latinas                                              | 1.00 (0.76-1.32)                           | 0.93 (0.71-1.23)                                               | 1.01 (0.79-1.29)                                                  |
| <i>Non-Pregnant Women</i>                                      |                                            |                                                                |                                                                   |
| Whites                                                         | Reference                                  | Reference                                                      | Reference                                                         |
| Blacks                                                         | 0.91 (0.87-0.95)                           | 0.83 (0.79-0.88)                                               | 0.85 (0.81-0.90)                                                  |
| Hispanics/Latinas                                              | 1.00 (0.95-1.05)                           | 0.96 (0.91-1.01)                                               | 0.98 (0.93-1.03)                                                  |
| <b>Trouble staying asleep (yes)</b>                            |                                            |                                                                |                                                                   |
| <i>Pregnant Women<sup>f</sup></i>                              |                                            |                                                                |                                                                   |
| Whites                                                         | Reference                                  | Reference                                                      | Reference                                                         |
| Blacks                                                         | 0.83 (0.67-1.03)                           | 0.80 (0.64-0.99)                                               | 0.84 (0.68-1.04)                                                  |
| Hispanics/Latinas                                              | 0.76 (0.60-0.96)                           | 0.74 (0.58-0.94)                                               | 0.79 (0.64-0.98)                                                  |
| <i>Non-Pregnant Women</i>                                      |                                            |                                                                |                                                                   |
| Whites                                                         | Reference                                  | Reference                                                      | Reference                                                         |
| Blacks                                                         | 0.87 (0.82-0.91)                           | 0.84 (0.79-0.89)                                               | 0.86 (0.81-0.91)                                                  |
| Hispanics/Latinas                                              | 0.88 (0.83-0.93)                           | 0.87 (0.82-0.92)                                               | 0.88 (0.83-0.93)                                                  |
| <b>Did not wake up most (≥4) days<br/>feeling rested (yes)</b> |                                            |                                                                |                                                                   |
| <i>Pregnant Women</i>                                          |                                            |                                                                |                                                                   |
| Whites                                                         | Reference                                  | Reference                                                      | Reference                                                         |

|                                                  |                  |                  |                  |
|--------------------------------------------------|------------------|------------------|------------------|
| Blacks                                           | 1.13 (0.93-1.36) | 1.07 (0.87-1.31) | 1.13 (0.93-1.36) |
| Hispanics/Latinas                                | 1.03 (0.82-1.30) | 0.99 (0.78-1.26) | 1.04 (0.83-1.31) |
| <i>Non-Pregnant Women</i>                        |                  |                  |                  |
| Whites                                           | Reference        | Reference        | Reference        |
| Blacks                                           | 0.98 (0.94-1.02) | 0.95 (0.91-0.99) | 0.97 (0.92-1.01) |
| Hispanics/Latinas                                | 1.00 (0.95-1.05) | 0.97 (0.92-1.02) | 0.99 (0.94-1.04) |
| <b>Took sleep medication in prior week (yes)</b> |                  |                  |                  |
| <i>Pregnant Women<sup>f</sup></i>                |                  |                  |                  |
| Whites                                           | Reference        | Reference        | Reference        |
| Blacks                                           | 1.77 (0.75-4.19) | 1.39 (0.58-3.34) | 1.59 (0.68-3.71) |
| Hispanics/Latinas                                | 1.49 (0.62-3.59) | 1.30 (0.54-3.11) | 1.56 (0.68-3.60) |
| <i>Non-Pregnant Women</i>                        |                  |                  |                  |
| Whites                                           | Reference        | Reference        | Reference        |
| Blacks                                           | 0.82 (0.74-0.91) | 0.71 (0.64-0.79) | 0.73 (0.65-0.81) |
| Hispanics/Latinas                                | 0.88 (0.78-1.00) | 0.82 (0.72-0.93) | 0.85 (0.75-0.96) |

<sup>a</sup> Model 1 is adjusted for continuous age in years.

<sup>b</sup> Model 2 is adjusted for age plus marital status, educational attainment, occupational class, and household income.

<sup>c</sup> Model 3 is adjusted for model 2 variables plus smoking status, alcohol consumption, physical activity, self-rated health status, hypertension, diabetes, heart disease, cancer, and depressive symptoms.

<sup>d</sup> Analysis excludes those who reported >9 hours of sleep.

<sup>e</sup> Analysis excludes those who reported <7 hours of sleep.

<sup>f</sup> Fewer than 50 participants in a cell of the crosstab between race-ethnicity and the sleep outcome.
